# Supplementary material
Source: PubMed Central journal article supplement (PMC5577376)
Supplement: NIHMS866876-supplement-1.pdf [file NIHMS866876-supplement-1.pdf]

1 **SUPPLEMENTARY INFORMATION**

2 **Targeting an N-terminal Acetylation Dependent Protein**

3 **Interaction**

4  
5 Daniel C. Scott<sup>1,2,10</sup>, Jared T. Hammill<sup>3,4,10</sup>, Jaeki Min<sup>3</sup>, David Y. Rhee<sup>5</sup>, Michele  
6 Connelly<sup>3</sup>, Vladislav O. Sviderskiy<sup>1</sup>, Deepak Bhasin<sup>3</sup>, Yizhe Chen<sup>3,4</sup>, Su-Sien Ong<sup>3</sup>,  
7 Sergio C. Chai<sup>3</sup>, Asli N. Goktug<sup>3</sup>, Guochang Huang<sup>6</sup>, Julie K. Monda<sup>1</sup>, Jonathan Low<sup>3</sup>,  
8 Ho Shin Kim<sup>3,4</sup>, Joao A. Paulo<sup>5</sup>, Joe R. Cannon<sup>5</sup>, Anang A. Shelat<sup>3</sup>, Taosheng Chen<sup>3</sup>, Ian  
9 R. Kelsall<sup>7</sup>, Arno F. Alpi<sup>8</sup>, Vishwajeeth Pagala<sup>9</sup>, Xusheng Wang<sup>9</sup>, Junmin Peng<sup>1,9</sup>,  
10 Bhuvanesh Singh<sup>6</sup>, J. Wade Harper<sup>5</sup>, Brenda A. Schulman<sup>1,2,11</sup>, R. Kip Guy<sup>3,4,11</sup>

11  
12 <sup>1</sup> Department of Structural Biology, St. Jude Children's Research Hospital, Memphis, TN  
13 38105

14 <sup>2</sup> Howard Hughes Medical Institute, St. Jude Children's Research Hospital, Memphis, TN  
15 38105

16 <sup>3</sup> Department of Chemical Biology and Therapeutics, St. Jude Children's Research  
17 Hospital, Memphis, TN 38105

18 <sup>4</sup> Present address: Department of Pharmaceutical Sciences, University of Kentucky,  
19 Lexington, KY 40508

20 <sup>5</sup> Department of Cell Biology, Harvard Medical School, Boston, MA 02115

21 <sup>6</sup> Laboratory of Epithelial Cancer Biology, Memorial Sloan-Kettering Cancer Center, New  
22 York, NY 10021

23 <sup>7</sup> MRC Protein Phosphorylation and Ubiquitylation Unit, University of Dundee, Dundee,  
24 UK

25 <sup>8</sup> Department of Molecular Machines and Signaling, Max Planck Institute of Biochemistry,  
26 Martinsried, Germany

27 <sup>9</sup> St. Jude Proteomics Facility, St. Jude Children's Research Hospital, Memphis, TN  
28 38105

29 <sup>10</sup> Co-first author

30 <sup>11</sup> Co-corresponding author

31 <sup>11</sup> Correspondence: Brenda.Schulman@stjude.org and kip.guy@uky.edu

32  
33  
34

35  
36  
37  
38

## Supplementary Results

**Supplementary Table 1.** Small molecule screening data

| Category | Parameter                           | Description                                                                                                                                                                                                                                                                                                                                                                                                                                                                                                                                                                                                                                                                                                                                      |
|----------|-------------------------------------|--------------------------------------------------------------------------------------------------------------------------------------------------------------------------------------------------------------------------------------------------------------------------------------------------------------------------------------------------------------------------------------------------------------------------------------------------------------------------------------------------------------------------------------------------------------------------------------------------------------------------------------------------------------------------------------------------------------------------------------------------|
| Assay    | Type of assay                       | Biochemical ligand competition assay                                                                                                                                                                                                                                                                                                                                                                                                                                                                                                                                                                                                                                                                                                             |
|          | Target                              | DCN1 (aka DCUN1D1)                                                                                                                                                                                                                                                                                                                                                                                                                                                                                                                                                                                                                                                                                                                               |
|          | Primary measurement                 | Detection of the Time-Resolved Fluoresce Resonance Energy Transfer (TR-FRET) signal between a biotinylated version of DCN1 (PONY domain alone), recognized by terbium-linked streptavidin, and a stapled peptide corresponding to N-terminally acetylated UBE2M labeled at its C-terminus with AlexaFluor 488.                                                                                                                                                                                                                                                                                                                                                                                                                                   |
|          | Key reagents                        | Biotinylated version of DCN1 (PONY domain alone); commercial terbium-linked streptavidin (ThermoFisher, PV3965); hydrocarbon stapled Acetyl-UBE2M <sup>1-12</sup> peptide (sequence Acetyl-MIKLZ*SLKZ*QKKC, where Z* is 2,4'-pentenylalanine closed after synthesis to create the hydrocarbon staple) labeled at its C-terminus with AlexaFluor 488.                                                                                                                                                                                                                                                                                                                                                                                             |
|          | Assay protocol                      | See online methods "TR-FRET Assay and HTS Campaign"                                                                                                                                                                                                                                                                                                                                                                                                                                                                                                                                                                                                                                                                                              |
|          | Additional comments                 | More details are provided in the supplementary information                                                                                                                                                                                                                                                                                                                                                                                                                                                                                                                                                                                                                                                                                       |
| Library  | Library size                        | 601,194                                                                                                                                                                                                                                                                                                                                                                                                                                                                                                                                                                                                                                                                                                                                          |
|          | Library composition                 | The current St. Jude Children's Research Hospital (SJCRH) department of Chemical Biology and Therapeutics (CBT) chemical library consists of roughly 600,000 unique molecules purchased from a variety of commercial sources. The library can be subdivided into 4 categories: approved drugs (~ 1,100 compounds); other known bioactives (~ 2,500 compounds); focused sets directed at defined targets including GPCR's, kinases, proteases, and phosphatases (~ 45,000 compounds), and the diversity collection. For more information regarding the selection of library members please see: Shelat, A. A.; Guy, R. K. Scaffold composition and biological relevance of screening libraries. <i>Nat Chem Biol</i> <b>2007</b> , 3 (8), 442-446 |
|          | Source                              |                                                                                                                                                                                                                                                                                                                                                                                                                                                                                                                                                                                                                                                                                                                                                  |
|          | Additional comments                 |                                                                                                                                                                                                                                                                                                                                                                                                                                                                                                                                                                                                                                                                                                                                                  |
| Screen   | Format                              | 384-well microtiter plates                                                                                                                                                                                                                                                                                                                                                                                                                                                                                                                                                                                                                                                                                                                       |
|          | Concentration(s) tested             | 30 μM, 0.1% DMSO (final assay concentration)                                                                                                                                                                                                                                                                                                                                                                                                                                                                                                                                                                                                                                                                                                     |
|          | Plate controls                      | Each assay plate contained 6 replicates of positive and negative controls. High signal: unlabeled UBE2M peptide; Low signal: DMSO                                                                                                                                                                                                                                                                                                                                                                                                                                                                                                                                                                                                                |
|          | Reagent/ compound dispensing system | The HTS was implemented on a fully-automated system (HighRes Biosolutions) with an integrated robotic arm (Stäubli). The protein and peptide master mixture was kept chilled at 4 °C, and dispensed into solid black 384-well assay plates (20 μL/well) using Matrix Wellmate bulk dispensers (ThermoFisher), followed by centrifugation using a V-Spin plate centrifuge (Agilent Technologies). Test articles and controls (stored as 10 mM solutions in DMSO donor plates) were transferred to the assay plates using a pintool (V&P Scientific) equipped with FP1S50 pins resulting in final compound concentrations of 30 μM.                                                                                                                |
|          | Detection instrument and software   | The TR-FRET signal with a PHERAstar FS plate reader (BMG Labtech) equipped with modules for                                                                                                                                                                                                                                                                                                                                                                                                                                                                                                                                                                                                                                                      |

|                   |                                          |                                                                                                                                                                                                                                                                                                                                                                                                                                                                                                                                                                                                                                                                              |
|-------------------|------------------------------------------|------------------------------------------------------------------------------------------------------------------------------------------------------------------------------------------------------------------------------------------------------------------------------------------------------------------------------------------------------------------------------------------------------------------------------------------------------------------------------------------------------------------------------------------------------------------------------------------------------------------------------------------------------------------------------|
|                   | Assay validation/QC                      | excitation at 337 nm and emissions at 490 and 520 nm. The integration start was set to 100 $\mu$ s and the integration time to 200 $\mu$ s. The number of flashes was fixed at 100. The ratio of 520/490 was used as TR-FRET signal in calculations.<br>The assay validation was carried out over three days during which three separate plates containing different layouts of the high, medium and low controls (i.e. plate 1, plate 2 and plate 3) were each run in triplicate. The screen performance was robust and highly reproducible with an average signal window of 9.8 and an average Z' factor of 0.7. The primary screen gave an average final Z'-prime of 0.56 |
|                   | Correction factors                       |                                                                                                                                                                                                                                                                                                                                                                                                                                                                                                                                                                                                                                                                              |
|                   | Normalization                            | Assay endpoints were normalized from 0% (DMSO only) to 100% inhibition (unlabeled competitor peptide) for hit selection and for curve fitting                                                                                                                                                                                                                                                                                                                                                                                                                                                                                                                                |
|                   | Additional comments                      |                                                                                                                                                                                                                                                                                                                                                                                                                                                                                                                                                                                                                                                                              |
| Post-HTS analysis | Hit criteria                             | Based on receiver operating characteristic (ROC) analysis, a cut-off value of > 45% inhibition was selected, which included approximately 80% of all true positives and a false positive rate of 20%.<br>856 active hits (0.15% hit rate)                                                                                                                                                                                                                                                                                                                                                                                                                                    |
|                   | Hit rate                                 |                                                                                                                                                                                                                                                                                                                                                                                                                                                                                                                                                                                                                                                                              |
|                   | Additional assay(s)                      | IC <sub>50</sub> values were determined for each hit using a 10-point dose-response with concentrations ranging from 0.003 – 60 $\mu$ M.                                                                                                                                                                                                                                                                                                                                                                                                                                                                                                                                     |
|                   | Confirmation of hit purity and structure | Representative compounds from top structural clusters were re-sourced, characterized for identity and purity by UPLC-MS/UV/ELSD, and evaluated in secondary assays.                                                                                                                                                                                                                                                                                                                                                                                                                                                                                                          |
|                   | Additional comments                      | More details are provided in the supplementary information                                                                                                                                                                                                                                                                                                                                                                                                                                                                                                                                                                                                                   |

40 **Supplementary Table 2. Crystal structure data collection and refinement statistics**

|                                                          | DCN1:NAcM-HIT<br>5V83.pdb  | DCN1:NAcM-OPT<br>5V86.pdb  | DCN1:NAcM-COV<br>5V88.pdb  | DCN4:CUL1 <sup>WHB</sup><br>5V89.pdb |
|----------------------------------------------------------|----------------------------|----------------------------|----------------------------|--------------------------------------|
| <b>Data collection</b>                                   |                            |                            |                            |                                      |
| Space group                                              | P21                        | P21                        | P21                        | C2                                   |
| Cell dimensions<br>a, b, c (Å)                           | 34.966, 97.280,<br>58.148  | 35.045, 59.302,<br>105.83  | 35.392, 59.181,<br>104.83  | 118.93, 38.58, 105.48                |
| $\alpha, \beta, \gamma$ (°)                              | 90.0, 104.392, 90.0        | 96.849, 90, 90             | 98.677, 90, 90             | 62.476, 90, 90                       |
| Resolution (Å)                                           | 50.0-2.00 (2.07-2.00)      | 50.0-1.37 (1.42- 1.37)     | 50.0-1.60 (1.66-1.60)      | 50.0-1.55 (1.61-1.55)                |
| $R_{\text{sym}}$ or $R_{\text{merge}}$<br>/ / $\sigma I$ | 7.5 (61.5)<br>13.77 (2.24) | 6.9 (44.7)<br>15.94 (2.33) | 3.5 (28.3)<br>13.37 (2.30) | 7.2 (43.2)<br>11.97 (1.48)           |
| Completeness (%)                                         | 99.93 (99.33)              | 97.56 (90.55)              | 93.57 (80.56)              | 93.36 (60.65)                        |
| Redundancy                                               | 3.8 (3.7)                  | 3.2 (2.4)                  | 1.8 (1.7)                  | 3.5 (2.0)                            |
| <b>Refinement</b>                                        |                            |                            |                            |                                      |
| Resolution (Å)                                           | 48.74 - 2.0                | 25.18 - 1.374              | 28.52 – 1.601              | 23.92 – 1.550                        |
| No. reflections                                          | 25,390                     | 77,074                     | 48,264                     | 36,927                               |
| $R_{\text{work}} / R_{\text{free}}$                      | 0.1715/0.2290              | 0.1554/0.1950              | 0.1593/0.1885              | 0.1503/0.1944                        |
| No. atoms                                                |                            |                            |                            |                                      |
| Protein                                                  | 2925                       | 2927                       | 2953                       | 2120                                 |
| Ligand/ion                                               | 27                         | 29                         | 37                         |                                      |
| Water                                                    | 293                        | 581                        | 472                        | 312                                  |
| <i>B</i> -factors                                        |                            |                            |                            |                                      |
| Protein                                                  | 38.40                      | 23.30                      | 31.90                      | 25.30                                |
| Ligand/ion                                               | 47.00                      | 22.20                      | 28.90                      |                                      |
| Water                                                    | 43.60                      | 39.60                      | 43.90                      | 34.60                                |
| R.m.s. deviations                                        |                            |                            |                            |                                      |
| Bond lengths (Å)                                         | 0.011                      | 0.013                      | 0.011                      | 0.009                                |
| Bond angles (°)                                          | 1.27                       | 1.40                       | 1.32                       | 1.13                                 |

69  
70  
71  
72

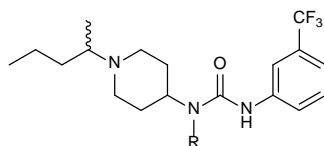

| No | R | IC <sub>50</sub> (μM)<br>(TR-FRET) <sup>1</sup> | % Covalent by<br>MS Analysis | No | R | IC <sub>50</sub> (μM)<br>(TR-FRET) <sup>1</sup> | % Covalent by<br>MS Analysis |
|----|---|-------------------------------------------------|------------------------------|----|---|-------------------------------------------------|------------------------------|
| 4  |   | 0.041 ± 0.008                                   | 100%                         | 5  |   | 0.256 ± 0.062                                   | 10%                          |
| 6  |   | 0.098 ± 0.040                                   | 0%                           | 7  |   | 0.076 ± 0.029                                   | 10%                          |
| 8  |   | 0.135 ± 0.129                                   | 10%                          | 9  |   | 0.222 ± 0.087                                   | 0%                           |
| 10 |   | 0.066 ± 0.038                                   | 0%                           | 11 |   | 0.028 ± 0.038                                   | 0%                           |
| 12 |   | > 34.5                                          | N.D                          | 13 |   | 23.6 ± 1.76                                     | N.D                          |
| 14 |   | 7.50 ± 1.89                                     | N.D                          | 15 |   | 7.74 ± 0.039                                    | N.D                          |

73

74 **Supplementary Table 3. Optimization of a covalent inhibitor targeting Cys115 of**75 **DCN1.** Compounds were prepared using slightly modified variants of the synthetic route76 used to prepare NAcM-COV and NAcM-COVCTRL detailed within the [Supplementary](#)77 [Note](#) and purified to > 90% as determined by ELSD/UV prior to testing. <sup>1</sup>The TR-FRET

78 assay used a modified procedure in which samples were incubated for 24 hours prior to

79 measuring the TR-FRET signal to afford sufficient time for covalent linkage to occur.

80 Potency values for the TR-FRET experiment are represented as means plus or minus  
81 standard deviation calculated from one independent experiment, run in triplicate.  
82 Compounds that showed significant potency in the TR-FRET assay were selected for  
83 further analysis by MaxEnt LC-TOF (time-of-flight) spectra after incubation of DCN1 (30  
84  $\mu\text{M}$ ) with DMSO as control or test articles (60  $\mu\text{M}$ ) overnight at 4 °C. The results from  
85 these MS studies are reported as the qualitative efficiency (% Bound by MS) of test  
86 articles to promote formation of a covalent bond with DCN1 as determined by mass shift.  
87 ND indicates values were not determined. Compounds were synthesized and tested as  
88 racemic mixtures and their characterization can be found in the [Supplementary Note](#).  
89

## Supplementary Figure 1

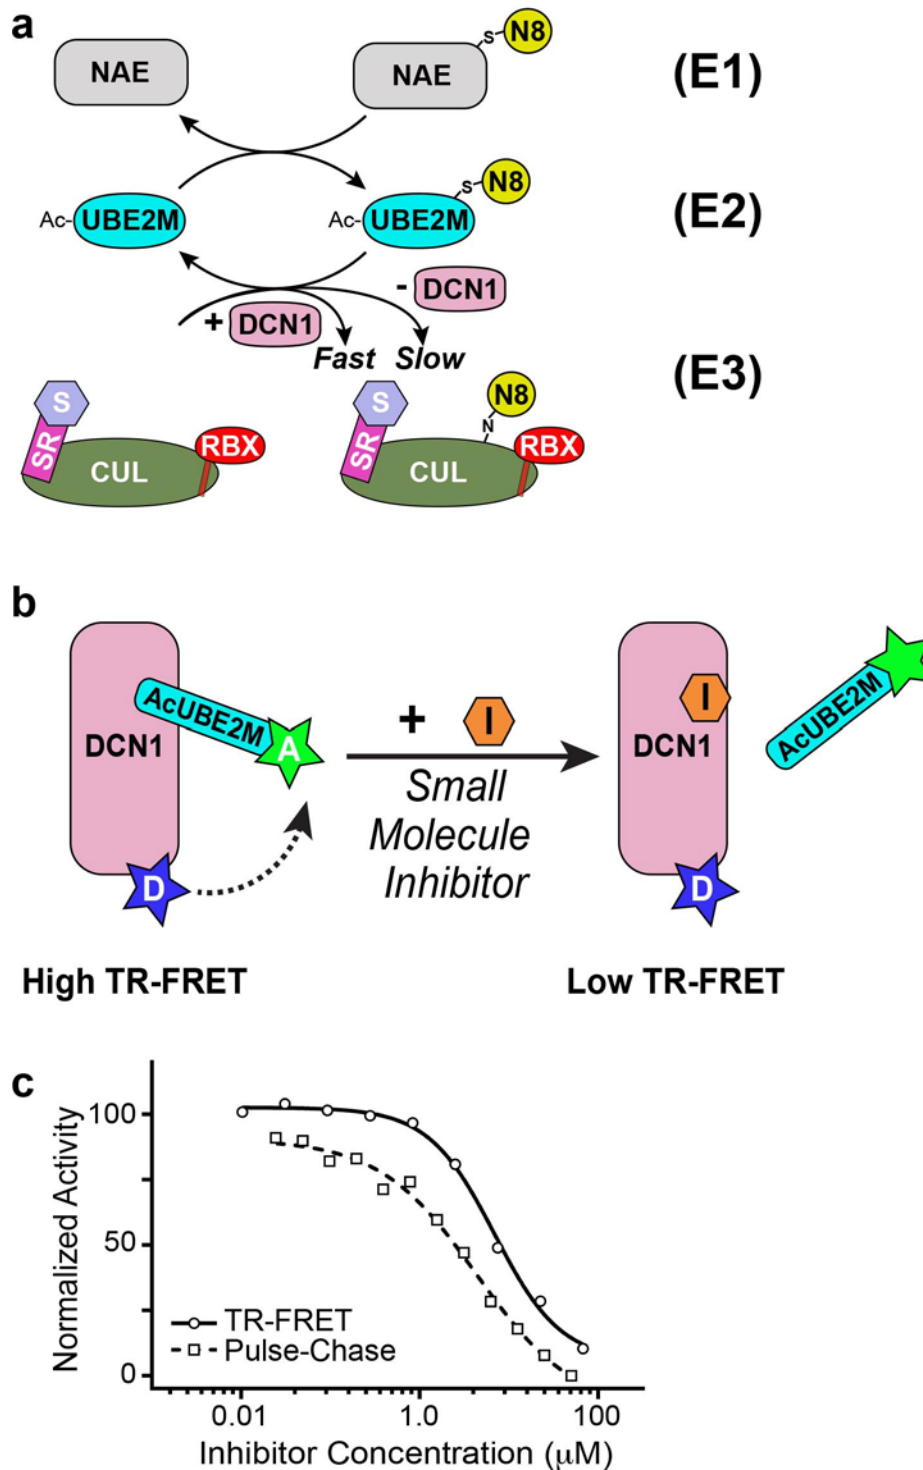

91 **Supplementary Figure 1. Targeting a N-acetyl dependent protein complex in the**  
 92 **neddylase enzyme cascade.**

93 (a) Schematic showing role of interaction between N-terminally acetylated UBE2M and  
 94 DCN1 in the enzymatic cascade leading to cullin Neddylation. NEDD8 is activated and  
 95 transferred from its E1 to the E2 UBE2M. NEDD8 is subsequently transferred from

96 UBE2M to a conserved lysine residue in a CUL protein in complex with RBX1, Substrate  
97 Receptor (SR), and Substrate (S). The reaction is accelerated by DCN1 binding to  
98 UBE2M's acetylated N-terminus.  
99 (b) Schematic of TR-FRET assay used for HTS. High TR-FRET signal is observed  
100 between Tb-DCN1 and Alexa-fluor488-labeled AcUBE2M. A competing inhibitor results  
101 in dissociation of AcUBE2M and Low TR-FRET signal.  
102 (c) Dose-response assays monitoring NAcM-HIT activity in TR-FRET (○ -  $IC_{50} = 6.91 \pm$   
103  $0.442 \mu\text{M}$ ) or pulse-chase assay (□ -  $IC_{50} = 4.36 \pm 0.150 \mu\text{M}$ ). These are representative  
104 examples from multiple biological replicates. Each graphed example represents a single  
105 biological replicate carried out in technical triplicate.  
106



## Supplementary Figure 2

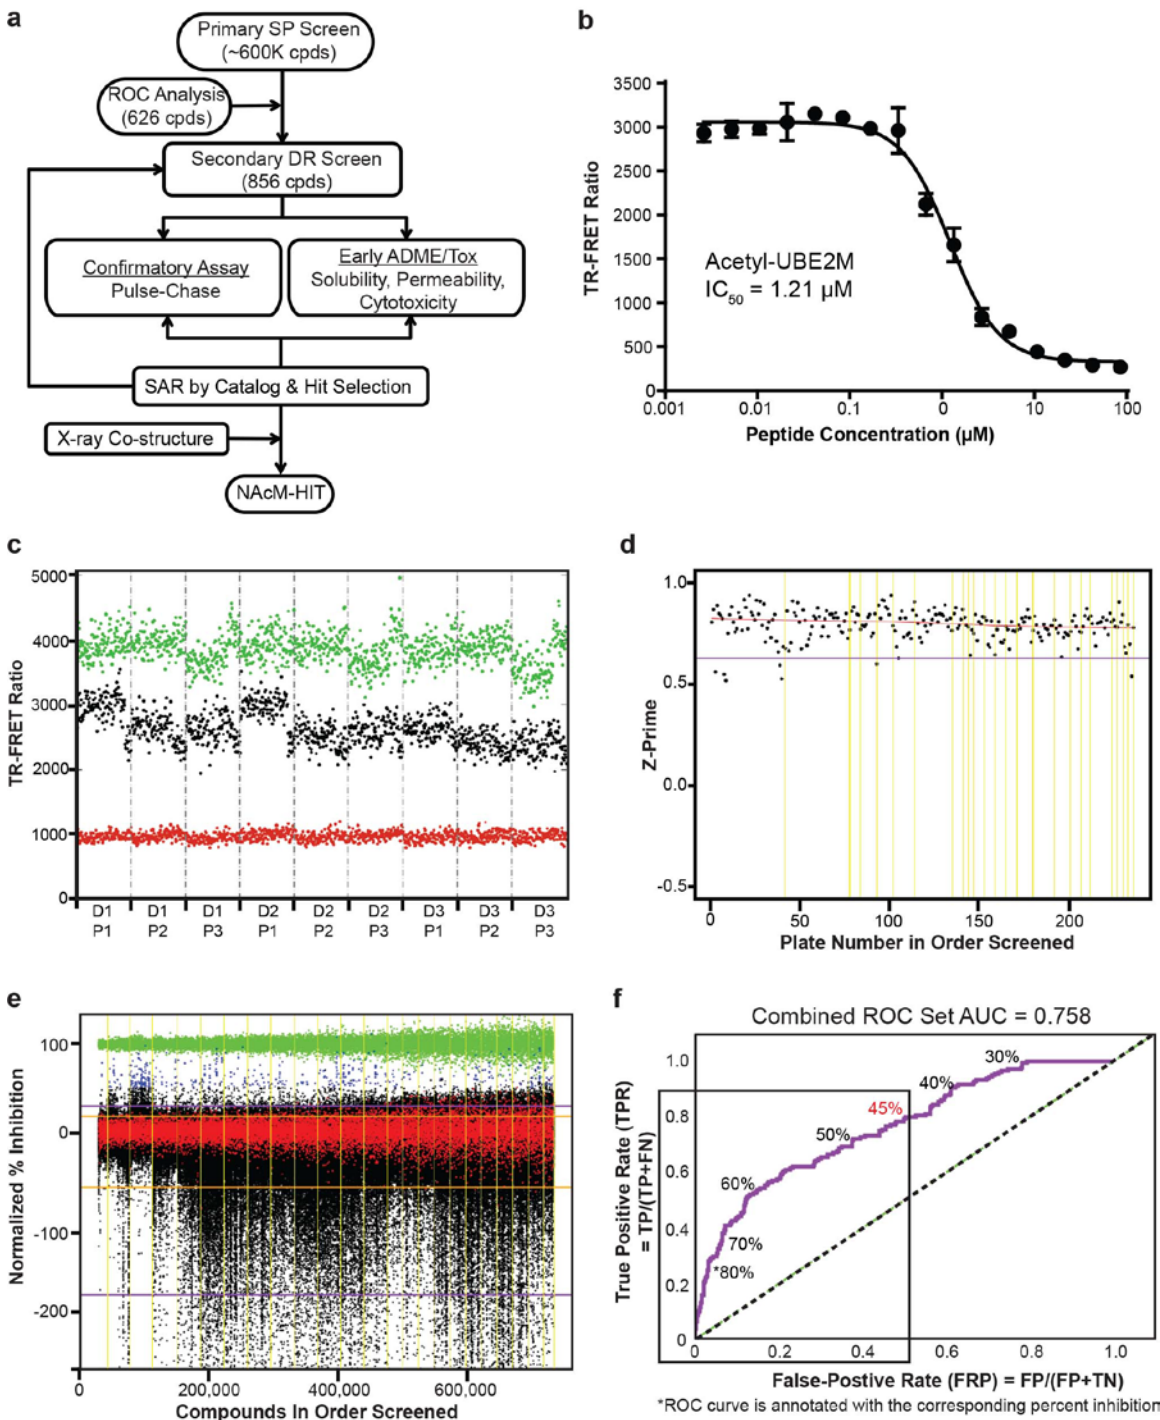

107  
 108  
 109  
 110  
 111

**Supplementary Figure 2. Summary and quality control data for the high-throughput screening campaign to identify a lead compound antagonizing N-terminal acetyl UBE2M binding to DCN1.**

(a) Schematic of HTS workflow

112 (b) Validation of our high-throughput ligand competition assay measuring the TR-FRET  
113 signal between a biotinylated version of DCN1, recognized by terbium-linked streptavidin,  
114 and a stapled peptide corresponding to N-terminally acetylated UBE2M labeled at its C-  
115 terminus with AlexaFluor 488 by competition with an unlabeled variant of the acetylated  
116 UBE2M peptide. Potency value represents the mean from one independent experiment,  
117 run in triplicate.

118 (c) Signal profiles (high-green, medium-black, and low-red) acquired during the assay  
119 validation, demonstrating the reproducibility of the assay over multiple days (D1 P1  
120 abbreviation corresponds to Day 1, Plate 1).

121 (d) Z-prime values calculated for each plate of the screen using plate level internal  
122 controls.

123 (e) Scatter plot of primary screen data shown as normalized percent inhibition. Each dot  
124 represents the activity of one compound and controls represent plate matched in plate  
125 controls (positive control, unlabeled UBE2M peptide (green); negative control, DMSO  
126 (red), and test compounds (hits blue and non-hits black) under the TR-FRET assay.

127 (f) Receiver operating characteristic (ROC) curve. The X-axis shows the false positive  
128 rate and the left Y-axis shows the true positive rate. A true positive was defined as a  
129 compound that produced a well-behaved sigmoidal inhibitory curve from a dose-  
130 response experiment using the primary assay. The curve is annotated with the  
131 corresponding percent inhibition. The assay has good discriminatory power (area under  
132 the curve = 0.74 with 95% confidence interval between 0.72 and 0.76). For reference, a  
133 perfect assay would have AUC 1.0, whereas a random assay has AUC of 0.5. Hit  
134 criteria of > 45% captures roughly 80% of the true positives based on the ROC analysis  
135 and was chosen empirically as the hit cutoff. A significant number of true hits likely  
136 remain in the band from beyond the 45% cut-off activity, and these compounds were not  
137 considered in this manuscript.

138

## Supplementary Figure 3

a

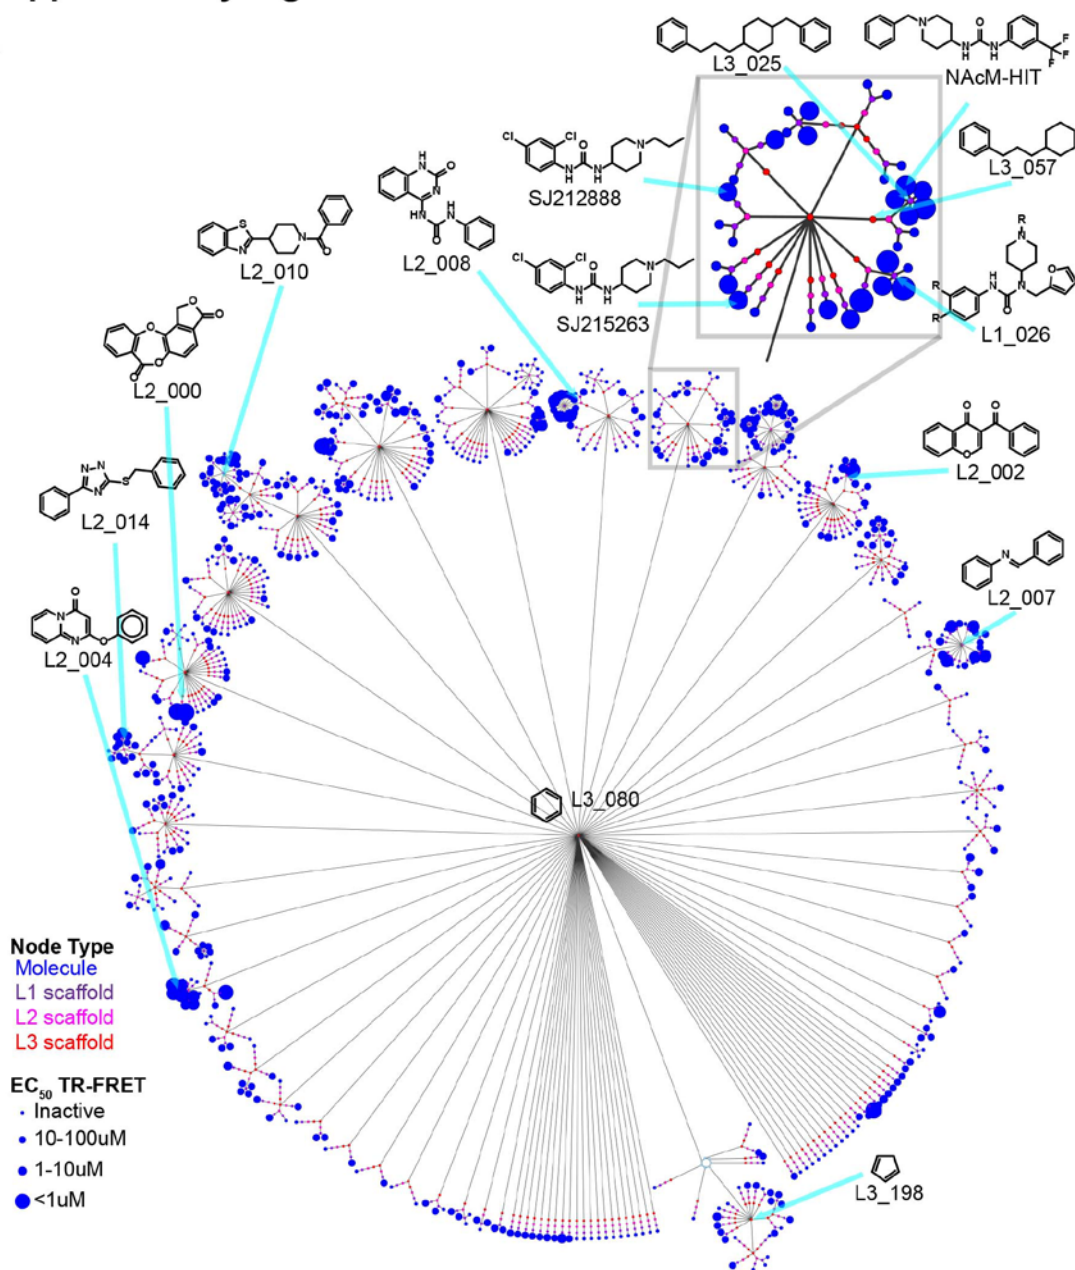

b

|                                                                                                                                                                                                                                                                                           |                                                                                                                                                                                                                                                                              |                                                                                                                                                                                                                                                                                 |
|-------------------------------------------------------------------------------------------------------------------------------------------------------------------------------------------------------------------------------------------------------------------------------------------|------------------------------------------------------------------------------------------------------------------------------------------------------------------------------------------------------------------------------------------------------------------------------|---------------------------------------------------------------------------------------------------------------------------------------------------------------------------------------------------------------------------------------------------------------------------------|
| <p><b>SJ212329 (NAcM-HIT)</b></p> <p>IC<sub>50</sub> = 6.91 ± 0.441 μM (TR-FRET)<br/>           EC<sub>50</sub> = 4.2 μM (Pulse-Chase)<br/>           Cytotox. = &gt; 24.1 μM (BJ Cells)<br/>           Sol. = 31.8 ± 1.6 μM<br/>           Perm. = 1280 ± 270 × 10<sup>-6</sup> cm/s</p> | <p><b>SJ342767</b></p> <p>IC<sub>50</sub> = 13.5 ± 5.28 μM (TR-FRET)<br/>           EC<sub>50</sub> = 2.8 μM (Pulse-Chase)<br/>           Cytotox. = &gt; 15.3 μM (BJ Cells)<br/>           Sol. = 11.4 ± 0.4 μM<br/>           Perm. = 911 ± 145 × 10<sup>-6</sup> cm/s</p> | <p><b>SJ431244</b></p> <p>IC<sub>50</sub> = 8.71 ± 0.655 μM (TR-FRET)<br/>           EC<sub>50</sub> = 0.572 μM (Pulse-Chase)<br/>           Cytotox. = &gt; 16.8 μM (BJ Cells)<br/>           Sol. = 0.3 ± 0.3 μM<br/>           Perm. = 1170 ± 323 × 10<sup>-6</sup> cm/s</p> |
|-------------------------------------------------------------------------------------------------------------------------------------------------------------------------------------------------------------------------------------------------------------------------------------------|------------------------------------------------------------------------------------------------------------------------------------------------------------------------------------------------------------------------------------------------------------------------------|---------------------------------------------------------------------------------------------------------------------------------------------------------------------------------------------------------------------------------------------------------------------------------|

140 **Supplementary Figure 3. Identification and validation of a top scaffold from the**  
141 **high-throughput screening (HTS) campaign.**

142 (a) Network graph showing the chemical structure clusters from some of the 182  
143 validated hits. Topologically similar molecules cluster together in the branches of the  
144 network. To construct the graph, molecules were first abstracted to scaffolds and then  
145 further to cores using the Murcko algorithm. Each of these structural entities is  
146 represented as a node, and nodes are connected via edges according to topological  
147 relationships with closeness being defined using the Tanimoto coefficient. Molecular  
148 nodes are coded to reflect potency based on size. The top half of the figure provides  
149 greater detail on some of the potent chemotypes and highlights the well-developed  
150 structure activity relationships that existed for the scaffold represented by NAcM-HIT.

151 (b) Representative members of the top three hit clusters identified from our HTS  
152 campaign. The shared N-benzyl (or benzoyl) piperidine pharmacophore element is  
153 highlighted in red. These scaffolds were chosen based on the combination of  
154 reasonable potency ( $IC_{50} < 10 \mu M$ ), evident SAR from analogs embedded in the  
155 screening set, and the perception that they might lend themselves to optimization.  
156 Values for the TR-FRET, solubility, permeability, and cytotoxicity experiments are  
157 represented as means plus or minus standard deviation calculated from one  
158 independent experiment, run in triplicate. Pulse-chase data were generated from a  
159 single experiment. There were more than 300 compounds containing this  
160 pharmacophore element included within our screening collection ([Supplementary](#)  
161 [Dataset 2](#)).

162



## Supplementary Figure 4

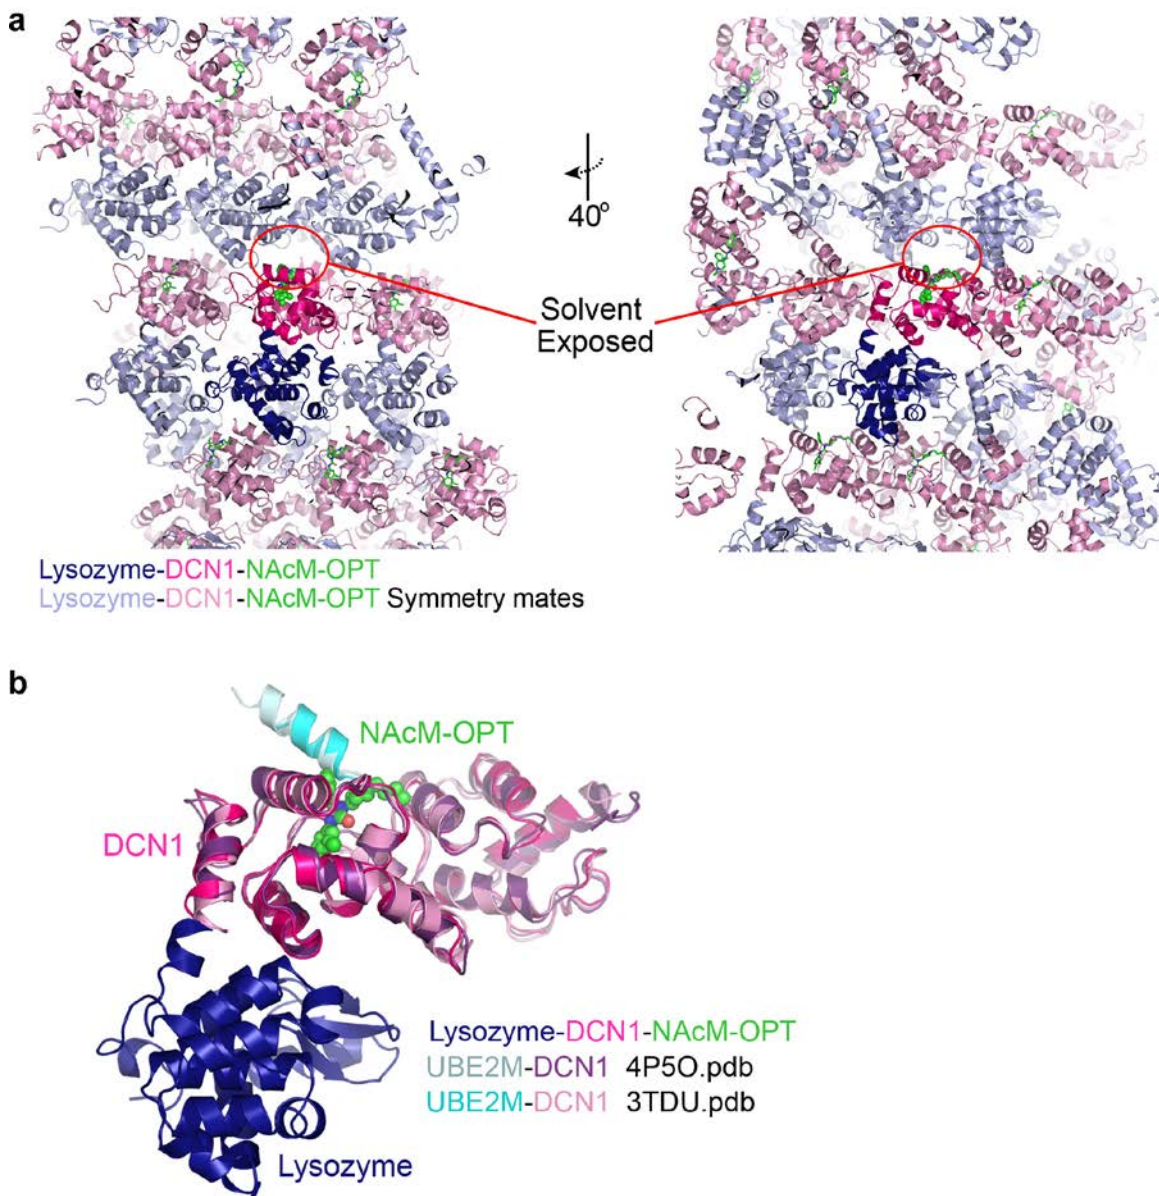

163

164

165 **Supplementary Figure 4. Crystal packing and integrity of DCN1 structure in the**

165 **Lysozyme-DCN1 fusion used for crystallography.**

166 (a) Two views of the crystal lattice in the Lysozyme-DCN1-NAcM-OPT structure  
167 demonstrate that the DCN1-NAcM-OPT binding pocket is solvent exposed and free of  
168 crystal packing artifacts. A single copy of Lysozyme (blue)-DCN1 (hot pink)-NAcM-OPT  
169 (green) in the asymmetric unit is shown and symmetry mates within the lattice colored  
170 light blue, pink, and green respectively.

171 B. Fusion of Lysozyme to the amino terminus of DCN1 does not alter the overall fold of  
172 DCN1. Structural superposition of DCN1 from the Lysozyme (blue)-DCN1 (hot pink)-  
173 NAcM-OPT (green) structure with full-length DCN1 (purple)-AcUBE2M (pale cyan,  
174 4P5O.pdb) and the AcUBE2M peptide bound to DCN1 (pink)-AcUBE2M (cyan,  
175 3TDU.pdb).

## Supplementary Figure 5

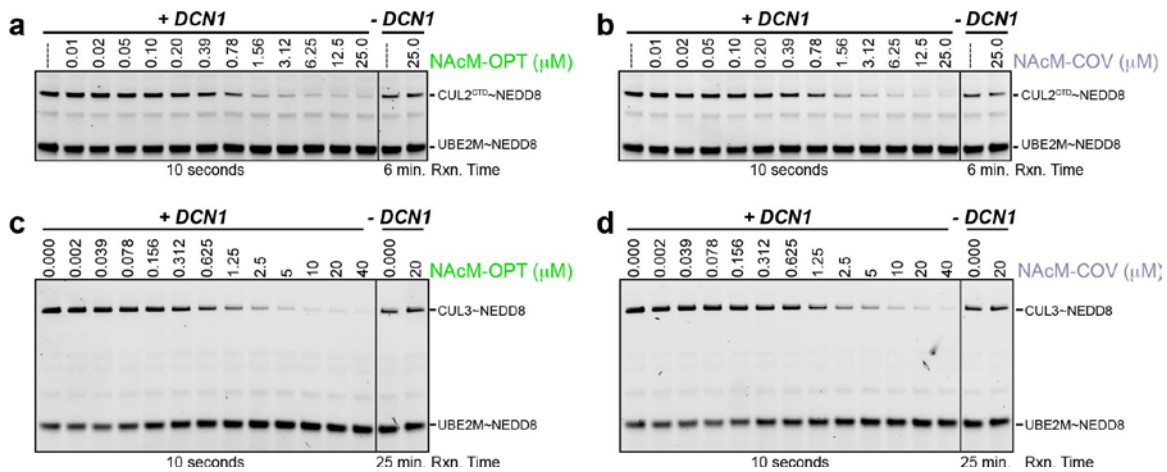

176

177

178 **Supplementary Figure 5. Dose response pulse-chase assays for NAcM-OPT and**  
 179 **NAcM-COV inhibition of DCN1 dependent neddylation of CUL2<sup>CTD</sup>-RBX1 and CUL3-**

180 **RBX1.** (a) Fluorescent scan of gels from pulse-chase assay monitoring the dose response  
 181 inhibition of CUL2<sup>CTD</sup>-RBX1 neddylation by the indicated concentrations of NAcM-OPT  
 182 after pre-incubation with DCN1 for 30 minutes at 4 °C.

183 (b) Same as (a), but with NAcM-COV.

184 (c) Same as (a), but monitoring neddylation of full-length CUL3-RBX1.

185 (d) Same as (c), but with the NAcM-COV.

186

## Supplementary Figure 6

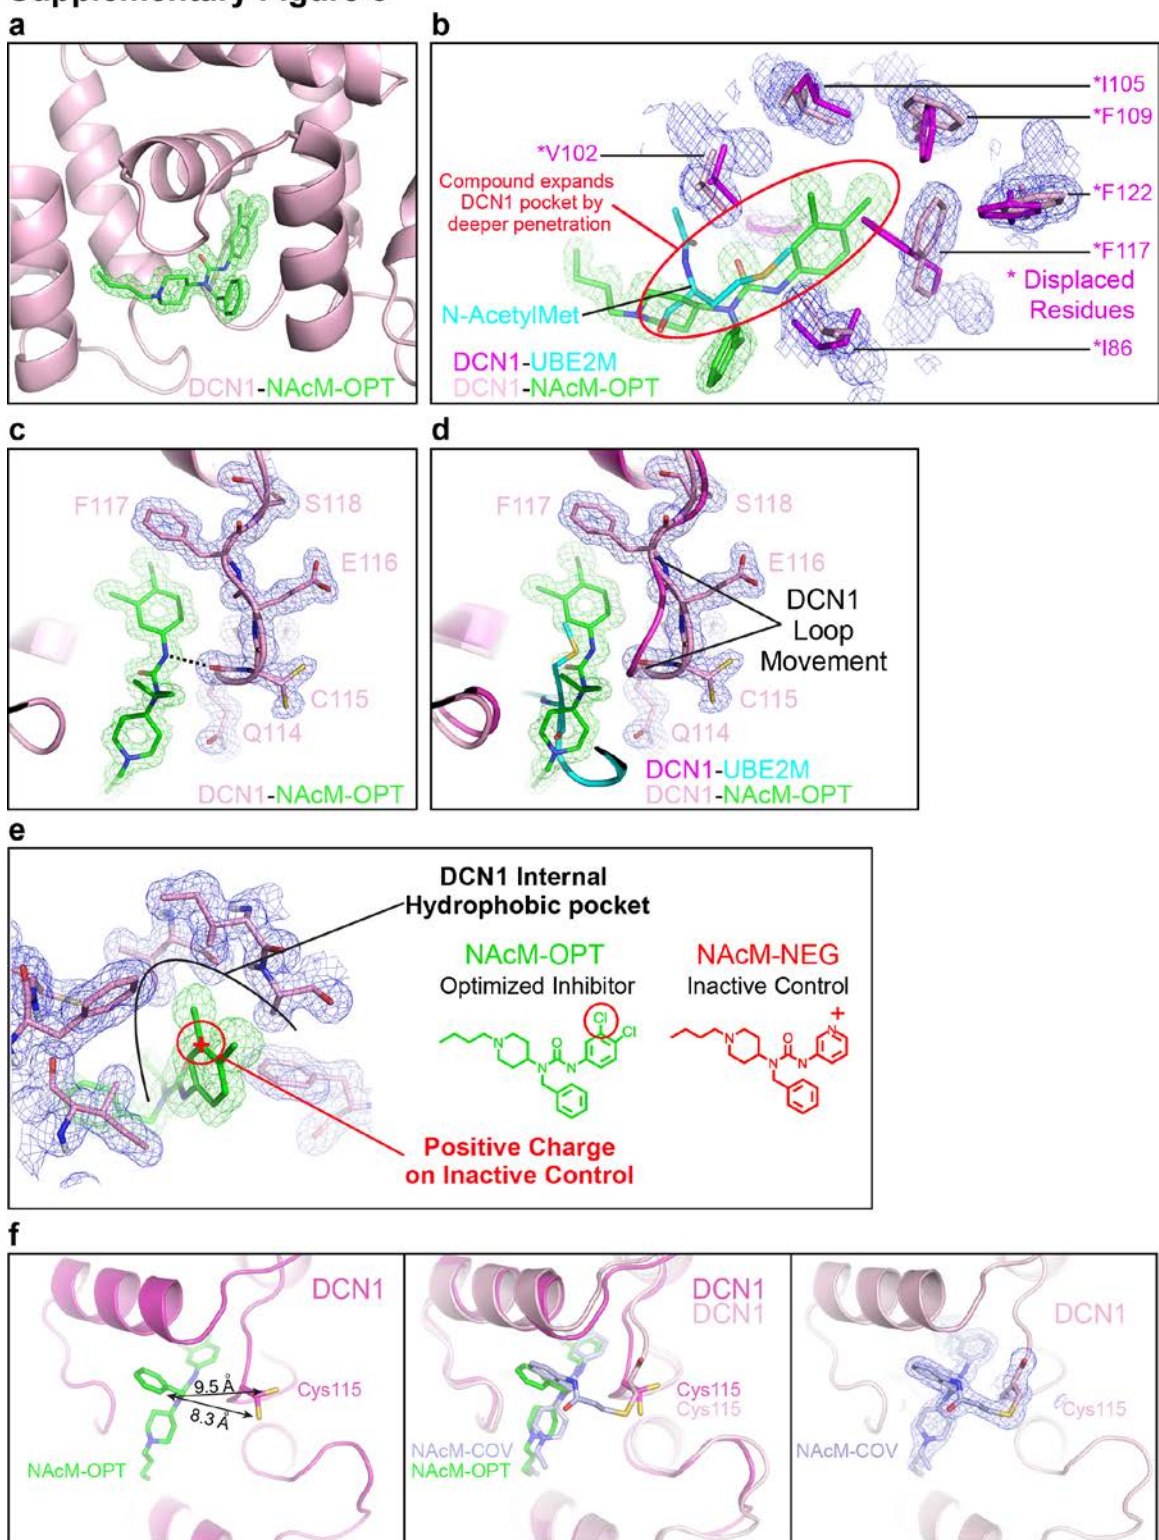

187  
188  
189

Supplementary Figure 6. Structural features and rearrangements of the N-Acetyl-Met binding pocket in NAcM bound DCN1.

190 (a) Simulated annealing omit map of Fo-Fc density (green mesh,  $3.0\sigma$ ) surrounding  
191 NAcM-OPT (green, sticks) in the DCN1-NAcM-OPT structure.

192 (b) Displacement of internal amino acids lining the N-Acetyl-Met binding pocket of DCN1  
193 upon NAcM-OPT binding. Shown is simulated annealing omit map (Fo-Fc, green mesh,  
194  $3.0\sigma$ ; 2Fo-Fc, blue mesh,  $1.0\alpha$ ) around the DCN1 (pink sticks)-NAcM-OPT (green,  
195 sticks) structure superimposed to DCN1 (purple, sticks)-AcUBE2M (cyan, sticks) from  
196 3TDU.pdb. Internal binding pocket residues that are displaced are highlighted. The red  
197 oval highlights generation of a deeper N-Acetyl-Met binding pocket upon inhibitor binding  
198 relative to previous DCN1 structures.

199 (c) Backbone residues from DCN1's Gln114 form a critical hydrogen bond with the urea  
200 aryl N-H from bound inhibitor. Shown is the simulated annealing omit map (Fo-Fc, green  
201 mesh,  $3.0\sigma$ ; 2Fo-Fc, blue mesh,  $1.0\alpha$ ) around the DCN1 (pink, sticks)- NAcM-  
202 OPT(green, sticks). The dashed line demarks the hydrogen bond interaction formed  
203 between DCN1's Gln114 backbone and the urea aryl N-H of NAcM-OPT.

204 (d) Same as (c), but structural superposition to DCN1 (purple cartoon)-AcUBE2M (cyan  
205 sticks) from 3TDU.pdb highlighting conformational rearrangements within a flexible loop  
206 (residues 114-117) of DCN1 upon NAcM-OPT binding.

207 (e) Rationale for the design of an inactive control analog. Shown is the simulated  
208 annealing omit map (Fo-Fc, green mesh,  $3.0\sigma$ ; 2Fo-Fc, blue mesh,  $1.0\alpha$ ) around the  
209 DCN1 (pink, sticks)-NAcM-OPT (green, sticks) structure. DCN1's hydrophobic pocket  
210 surrounding the inhibitor and corresponding position of the ionizable pyridine ring of the  
211 inactive control NAcM-NEG are highlighted.

212 (f) Structure based covalent targeting of DCN1's Cys115 for development of a covalent  
213 inhibitor. Left panel - Structure of DCN1 (hot pink)-NAcM-OPT (green, sticks) with  
214 Cys115 of DCN1 in sticks. Distances between the ortho-N-acrylamide substitution and  
215 Cys115 are shown. Middle panel - Superposition of DCN1 (hot pink)-NAcM-OPT (green,  
216 sticks) and DCN1 (pink)-NAcM-COV (light blue sticks) with the covalent linkage to  
217 Cys115 shown in sticks. Right panel - 2Fo-Fc density surrounding NAcM-COV (light blue,  
218 sticks) and Cys115 (pink sticks) in the DCN1-NAcM-COV structure.

219



## Supplementary Figure 7

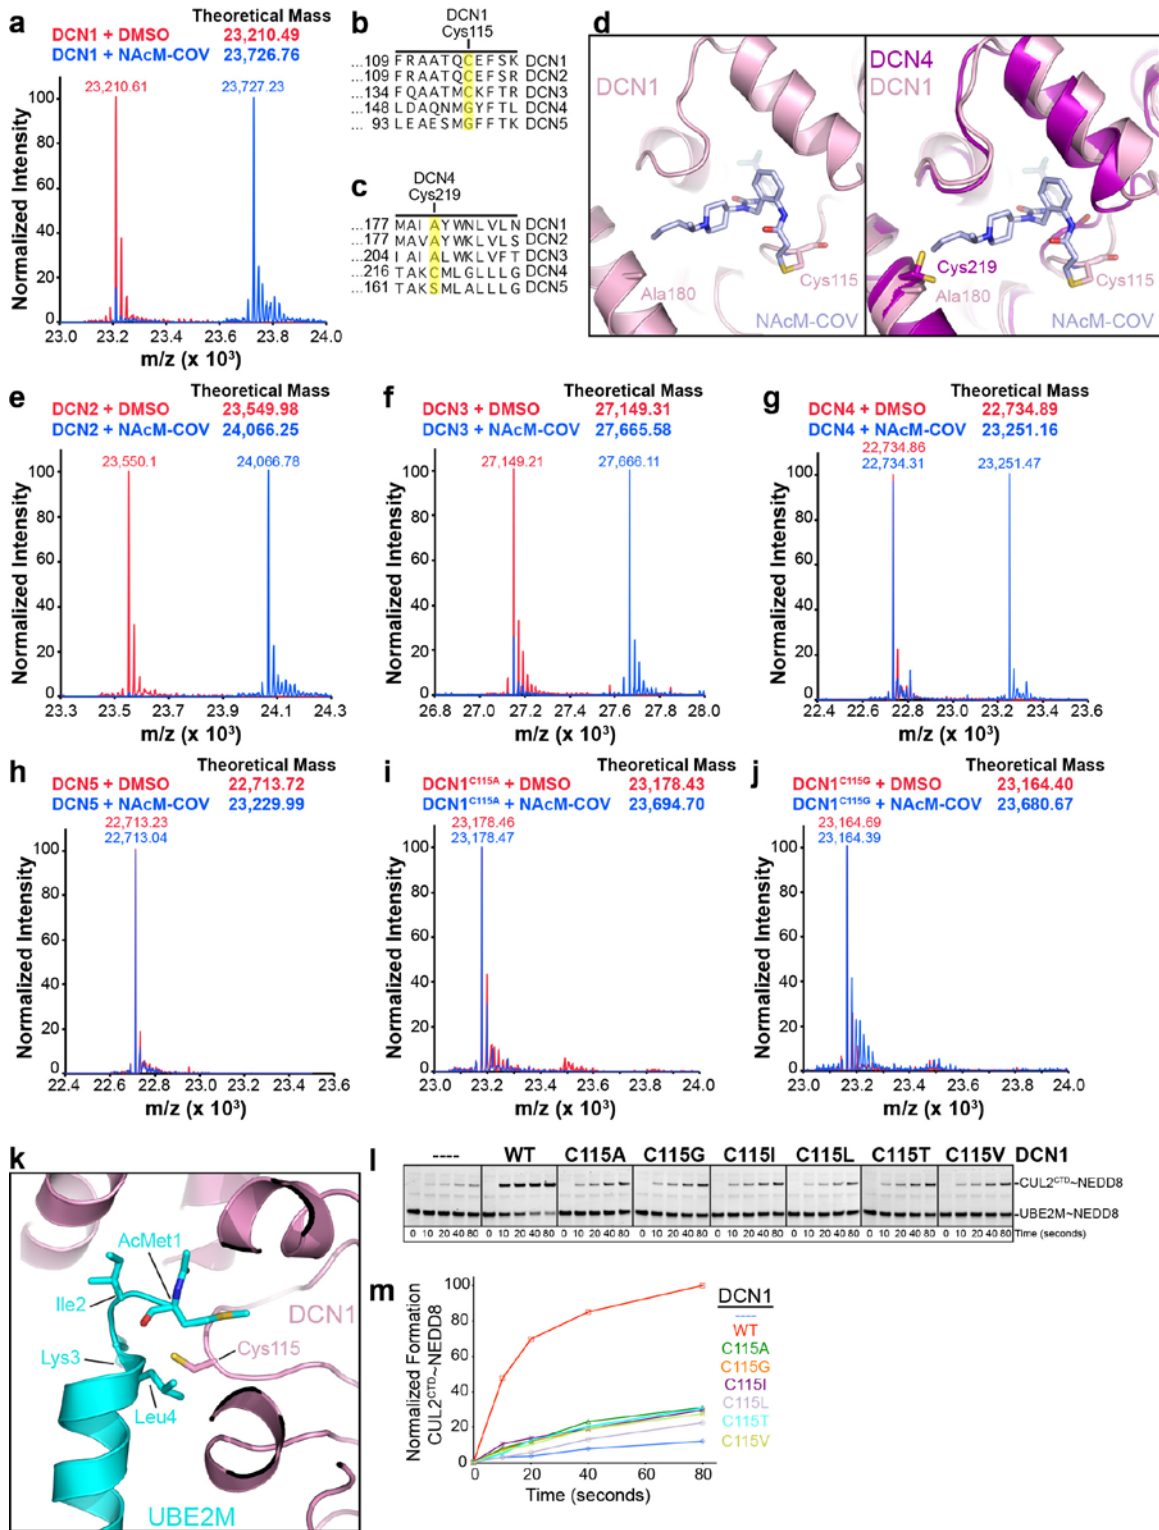

220  
 221  
 222

Supplementary Figure 7. Covalent adduct formation, DCN1 residue targeting, and DCN family selectivity of the covalent inhibitor NAcM-COV.

223 (a) MaxEnt LC-TOF (time-of-flight) spectra after incubation of DCN1 (30  $\mu$ M) with DMSO  
224 (red spectrum) or NAcM-COV (60  $\mu$ M) (blue spectrum) overnight at 4 °C. Incubation with  
225 NAcM-COV shifts the mass of DCN1  $\sim$ +516.27 da, consistent with formation of a DCN1-  
226 NAcM-COV covalent adduct.  
227 (b) Structure based sequence alignment of the DCN family members surrounding the  
228 NAcM-COV targeted Cys115 of DCN1.  
229 (c) Structure based sequence alignment of the DCN family members surrounding the  
230 presumed NAcM-COV targeted Cys219 of DCN4.  
231 (d) Cysteine targeting of DCN4 by NAcM-COV. Left panel – Structure of DCN1 (pink)-  
232 NAcM-COV (light blue, sticks) with the covalent linkage between NAcM-COV and  
233 DCN1's Cys115 and the position of Ala180 highlighted. Right panel – same as left panel,  
234 but with alignment of DCN4. The potential targeted Cys of DCN4 (Cys219) is highlighted.  
235 (e) Same as (a), but with DCN2.  
236 (f) Same as (a), but with DCN3.  
237 (g) Same as (a), but with DCN4.  
238 (h) Same as (a), but with DCN5.  
239 (i) Same as (a), but with C115A DCN1.  
240 (j) Same as (a), but with C115G DCN1.  
241 (k) Cys115 of DCN1 is part of a critical interaction surface with AcUBE2M. Structure of  
242 DCN1(pink)-AcUBE2M (cyan, sticks) from 3TDU.pdb highlighting the position of Cys115  
243 from DCN1 nestled between N-AcMet1 and Leu4 of UBE2M.  
244 (l) Fluorescent scan of gels from pulse-chase assay monitoring the stimulation of  
245 Cul2<sup>CTD</sup>-RBX1 neddylation by WT and the indicated Cys115 mutants of DCN1.  
246 (m) Quantification of the results from (l).  
247

## Supplementary Figure 8

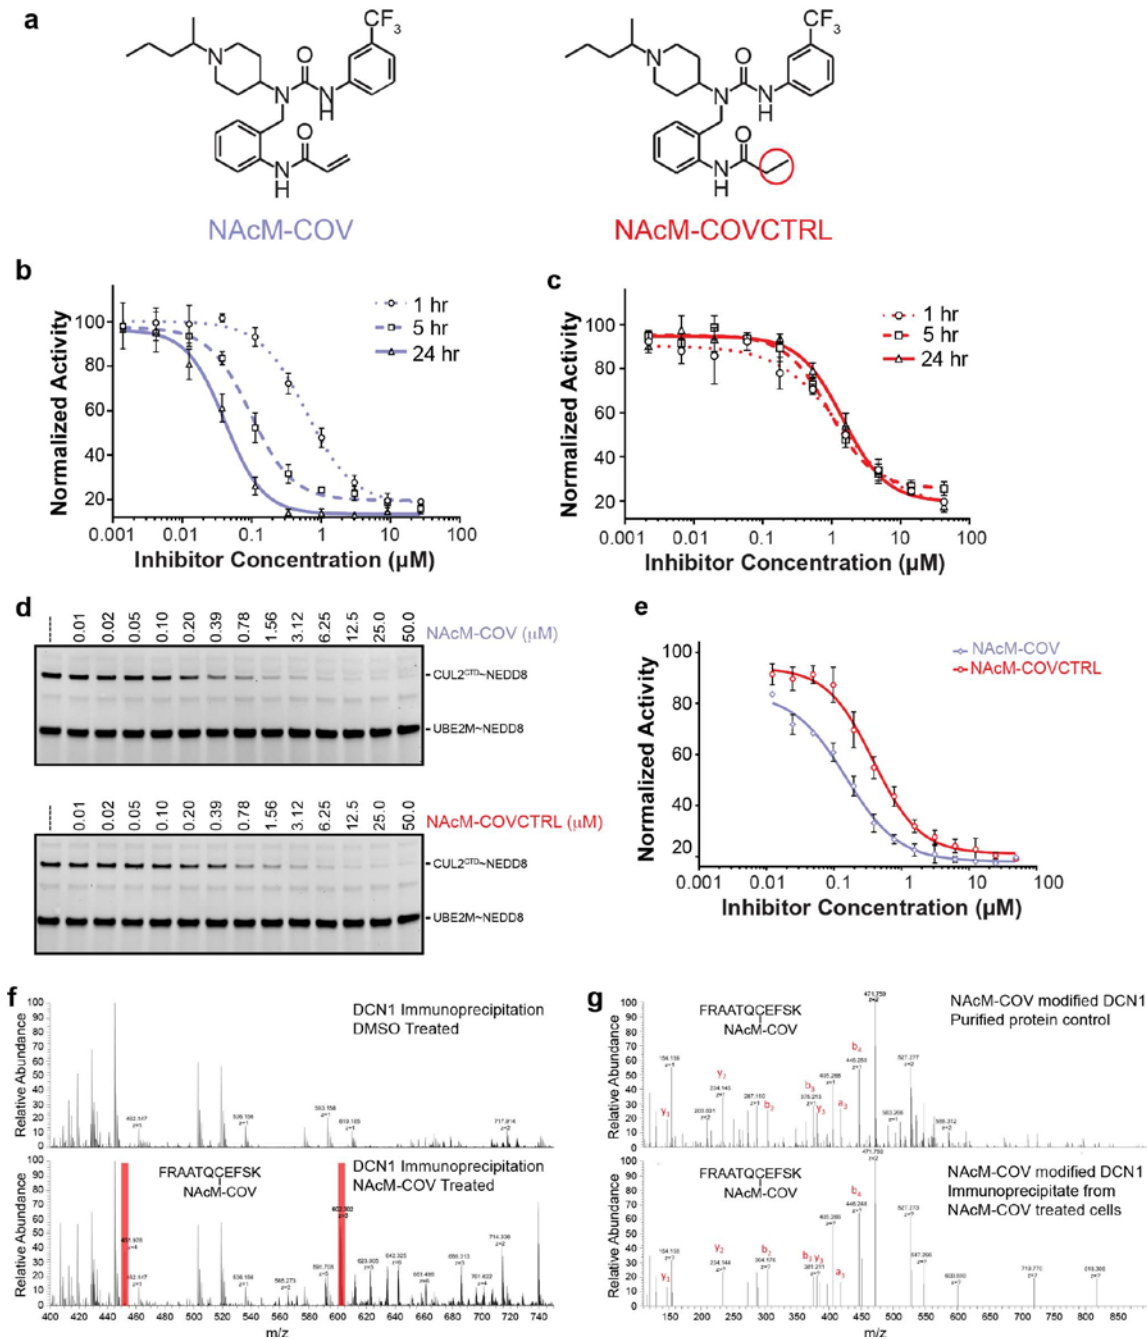

248

249

### Supplementary Figure 8. Potency of NAcM-COV is dependent on the presence of an electrophilic warhead.

250

251 (a) Chemical structures of NAcM-COV and NAcM-COVCTRL, highlighting that in NAcM-  
252 COVCTRL the acrylamide warhead is replaced with a propionamide that is incapable of  
253 forming a covalent linkage.

254

255 (b) Time-course evaluation of the TR-FRET potency for NAcM-COV, demonstrating that  
256 potency is increased in a time-dependent manner. NAcM-COV exhibited TR-FRET IC<sub>50</sub>  
values of  $0.619 \pm 0.117 \mu\text{M}$  after one hour of pre-incubation with DCN1,  $0.0969 \pm 0.022$

257  $\mu\text{M}$  after five hours of pre-incubation with DCN1, and  $0.0413 \pm 0.008 \mu\text{M}$  after 24 hours  
258 of pre-incubation with DCN1. These results support the irreversible nature of NAcM-  
259 COV binding. Times correspond to different lengths of incubation of the complete TR-  
260 FRET assay mixture prior to measuring the TR-FRET signal. Potency values are  
261 represented as means plus or minus standard deviation calculated from one  
262 independent experiment, run in triplicate.

263 (c) Time-course evaluation of the TR-FRET potency for NAcM-COVCTRL,  
264 demonstrating that potency is not increased in a time-dependent manner. NAcM-  
265 COVCTRL exhibited TR-FRET  $\text{IC}_{50}$  values of  $1.34 \pm 0.152 \mu\text{M}$  after one hour of pre-  
266 incubation with DCN1,  $0.931 \pm 0.049 \mu\text{M}$  after five hours of pre-incubation with DCN1,  
267 and  $1.46 \pm 0.237 \mu\text{M}$  after 24 hours of pre-incubation with DCN1. Times correspond to  
268 different lengths of incubation of the complete TR-FRET assay mixture prior to  
269 measuring the TR-FRET signal. Potency values are represented as means plus or  
270 minus standard deviation calculated from one independent experiment, run in triplicate.

271 (d) Fluorescent scan of gels from pulse-chase assay monitoring the dose response  
272 inhibition of  $\text{CUL2}^{\text{CTD}}$ -RBX1 neddylation by the indicated concentrations of NAcM-OPT or  
273 NAcM-COVCTRL after pre-incubation with DCN1 overnight at  $4^\circ\text{C}$ .

274 (e) Quantification of the results from panel d. NAcM-COV exhibited a pulse-chase  $\text{IC}_{50}$   
275 value of  $0.151 \pm 0.011 \mu\text{M}$  and NAcM-COVCTRL exhibited a pulse-chase  $\text{IC}_{50}$  value of  
276  $0.382 \pm 0.051 \mu\text{M}$  after 24 hours of pre-incubation with DCN1. Plotted are the averages  
277 of three independent experiments.

278 (f) MS1 spectra averaged over the course of the elution profile of the NAcM-COV  
279 modified FRAATQCEFSK from DCN1 immunoprecipitates from cell treated with DMSO  
280 (top panel) or NAcM-COV (bottom panel). Highlighted in red are the triply and quadruply  
281 charged precursors of NAcM-COV modified FRAATQCEFSK.

282 (g) Product ion spectra after HCD activation of the quadruply charged precursor ( $m/z$   
283 451.73) from NAcM-COV treated DCN1 purified protein (top panel) or DCN1  
284 immunoprecipitates from NAcM-COV treated cells (bottom panel).

285  
286

## Supplementary Figure 9

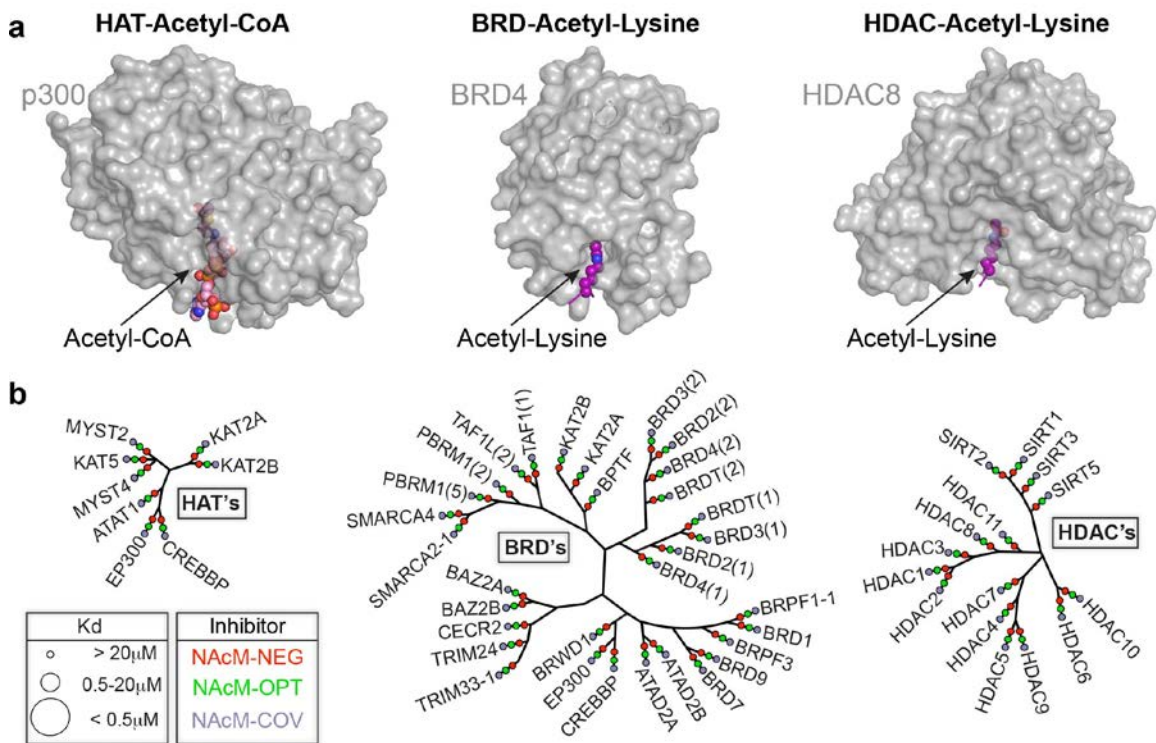

287  
288  
289  
290  
291  
292  
293  
294  
295  
296  
297  
298  
299  
300  
301  
302  
303  
304  
305

### Supplementary Figure 9. NAcM inhibitors do not inhibit the activity of Histone Acetyltransferases, Bromodomains, or Histone Deacetylases.

(a) Structural views of other Acetyl dependent protein interactions. Left panel – Histone acetyl transferases (HATs) as represented by p300 (gray, surface)- Acetyl-CoA (purple, spheres) from 4PZS.pdb. Center panel – Bromodomains (BRDs) as represented by BRD4(1) (gray, surface)- Histone H4 K5Ac (purple, spheres) from 3UVW.pdb. Right panel – Histone deacetylases (HDACs) as represented by HDAC8 (gray, surface)- K8Ac (purple, spheres) from 2V5W.pdb.

(b) NAcM-NEG (red), NAcM-OPT (green), and NAcM-COV (light blue) were tested at a single concentration of 10  $\mu$ M against a panel of HAT's (left panel), BRD's (center panel) and HDAC's (right panel). Any interaction apparently inhibited by > 40% in the screening test was subjected to duplicate dose-response studies using the same assays. No interaction was significantly inhibited by any test compound. Inferred binding Kd's for each inhibitor tested, as determined from percent of control inhibition values, are plotted on similarity based dendrogram diagrams for each family member tested ([Supplemental Dataset 3-5](#)).

## Supplementary Figure 10

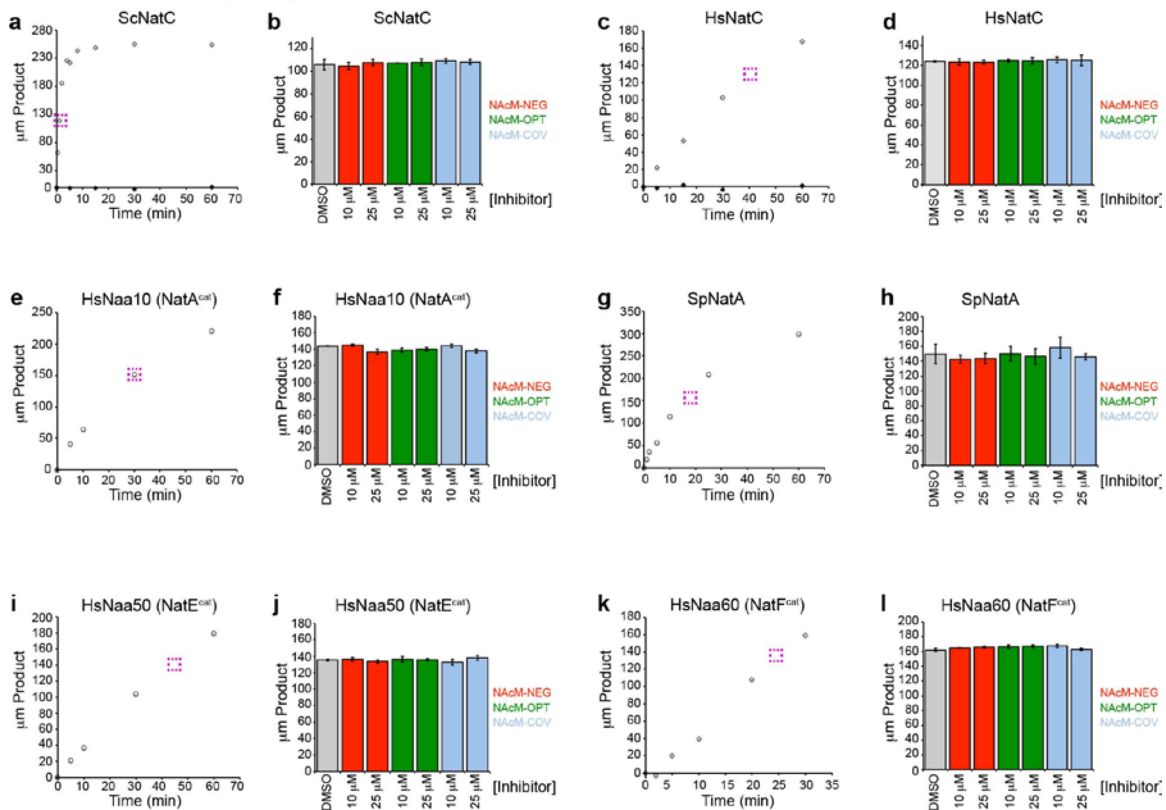

306

307

308

### Supplementary Figure 10. NAcM inhibitors do not inhibit the activity of N-terminal acetyltransferases.

309 (a) Time-course assay following product formation over time for N-terminal acetylation of  
 310 the peptide substrate NH<sub>2</sub>-MIKLFSLKQQKKEESAGGTKGSSKK by the yeast NatC  
 311 complex. The dashed purple square marks the time point chosen for subsequent assays  
 312 to evaluate the effect of NAcM inhibitors.

313 (b) Product formation by the yeast NatC complex in the absence or presence of the  
 314 indicated concentrations of NAcM inhibitors. The results are from one independent  
 315 experiment repeated in triplicate.

316 (c) Same as (a), but with the human NatC complex.

317 (d) Same as (b), but with the human NatC complex.

318 (e) Time-course assay following product formation over time for N-terminal acetylation of  
 319 the peptide substrate NH<sub>2</sub>-EEEIAALRWGRPVGRRRRPVRVYP by hNaa10, the catalytic  
 320 subunit of the human NatA complex. The dashed purple square marks the time point  
 321 chosen for subsequent assays to evaluate the effect of NAcM inhibitors.

322 (f) Product formation by hNaa10 in the absence or presence of the indicated  
 323 concentrations of NAcM inhibitors. The results are from one independent experiment  
 324 repeated in triplicate.

325 (g) Time-course assay following product formation over time for N-terminal acetylation of  
 326 the peptide substrate NH<sub>2</sub>-SESSSKSRWGRPVGRRRRPVRVYP by  
 327 the NatA complex from *Schizosaccharomyces pombe*. The dashed purple square marks  
 328 the time point chosen for subsequent assays to evaluate the effect of NAcM inhibitors.

329 (h) Product formation by *Schizosaccharomyces pombe* NatA complex in the absence or  
 330 presence of the indicated concentrations of NAcM inhibitors. The results are from one  
 331 independent experiment repeated in triplicate.

332 (i) Time-course assay following product formation over time for N-terminal acetylation of  
333 the peptide substrate NH<sub>2</sub>-MLGPEGGRWGRPVGRRRRPVRVYP by hNaa50, the  
334 catalytic subunit of the human NatE complex. The dashed purple square marks the time  
335 point chosen for subsequent assays to evaluate the effect of NAcM inhibitors.  
336 (j) Product formation by hNaa50 in the absence or presence of the indicated  
337 concentrations of NAcM inhibitors. The results are from one independent experiment  
338 repeated in triplicate.  
339 (k) Time-course assay following product formation over time for N-terminal acetylation of  
340 the peptide substrate NH<sub>2</sub>-MAPLDLDRWGRPVGRRRRPVRVYP by hNaa60, the  
341 catalytic subunit of the human NatF complex. The dashed purple square marks the time  
342 point chosen for subsequent assays to evaluate the effect of NAcM inhibitors.  
343 (l) Product formation by hNaa60 in the absence or presence of the indicated  
344 concentrations of NAcM inhibitors. The results are from one independent experiment  
345 repeated in triplicate.  
346



## Supplementary Figure 11

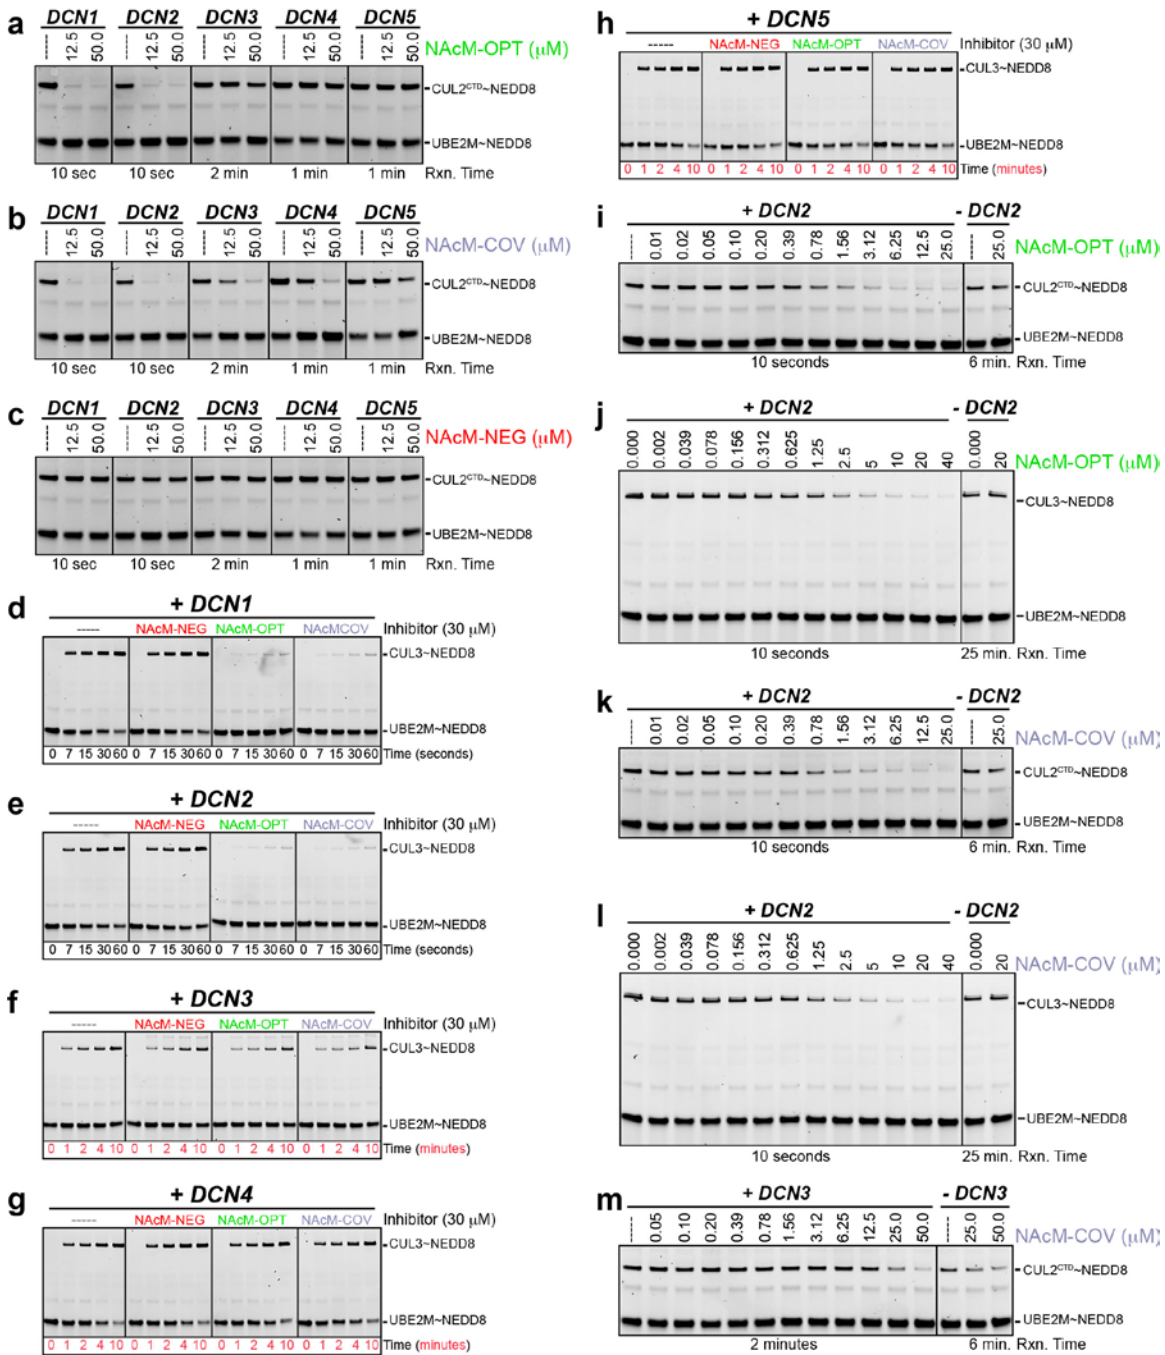

347

348

349

### Supplementary Figure 11. Isoform selectivity of NAcM inhibitors towards DCN family members.

350 (a) Fluorescent scan of gels from pulse-chase assay monitoring the effects of the  
351 indicated concentrations of NAcM-OPT on the indicated DCN family member mediated  
352 stimulation of Cul2<sup>CTD</sup>-RBX1 neddylation.

353

(b) Same as (a), but with NAcM-COV.

354

(c) Same as (a), but with NAcM-NEG.



- 355 (d) Fluorescent scan of gels from pulse-chase assay monitoring the effects of NAcM-  
356 NEG, NAcM-OPT, and NAcM-COV at 30  $\mu$ M on DCN1 dependent neddylation of full-  
357 length CUL3-RBX1.
- 358 (e) Same as (d), but with DCN2.
- 359 (f) Same as (d), but with DCN3.
- 360 (g) Same as (d), but with DCN4.
- 361 (h) Same as (d), but with DCN5.
- 362 (i) Fluorescent scan of gels from pulse-chase assay monitoring the dose-response  
363 inhibition of DCN2 mediated stimulation of Cul2<sup>CTD</sup>-RBX1 neddylation by NAcM-OPT.
- 364 (j) Same as (i), but with full-length CUL3-RBX1.
- 365 (k) Same as (i), but with the NAcM-COV.
- 366 (l) Same as (k), but with full-length CUL3-RBX1.
- 367 (m) Same as (k), but with DCN3.
- 368

## Supplementary Figure 12

**a**

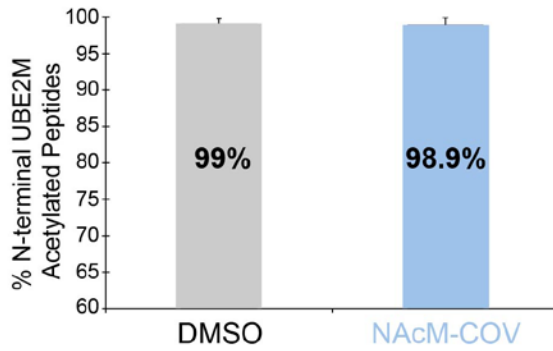

**b**

8-plex TMT Analysis

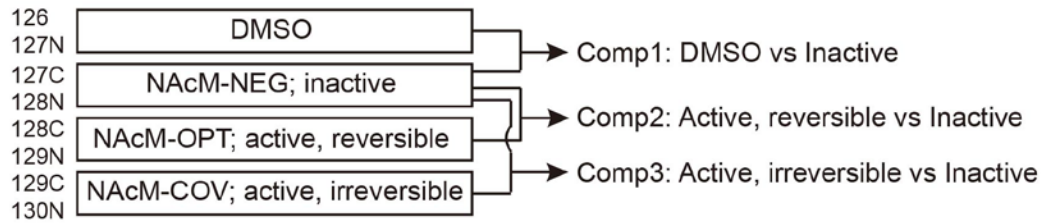

**c**

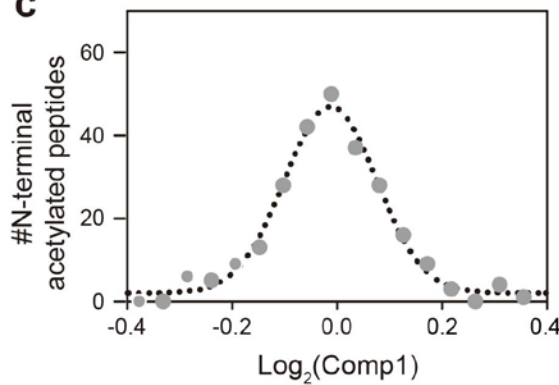

**d**

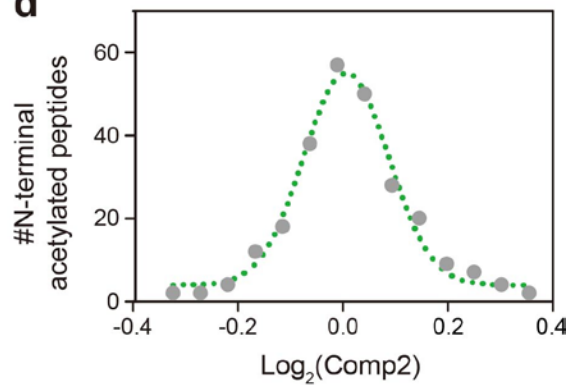

**e**

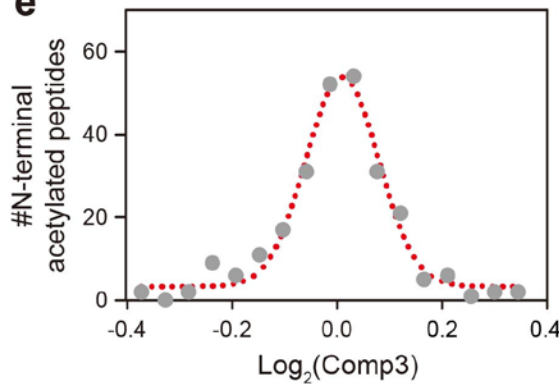

**f**

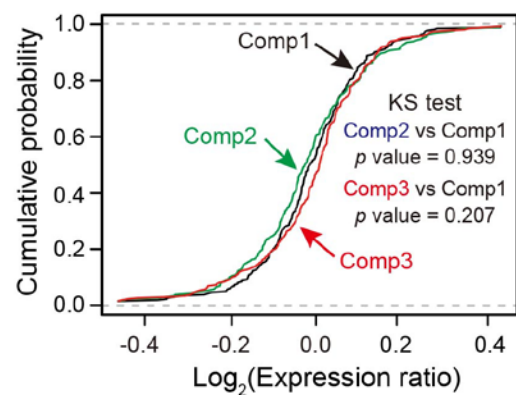

369

370

**Supplementary Figure 12. NAcM's do not effect N-terminal acetylation in cells.**

371 (a) IP-MS of UBE2M from NAcM-COV treated cells confirming that inhibitor treatment does not  
372 alter the acetylation status of UBE2M. 293T cells expressing UBE2M-FLAG-HA were treated for  
373 24 hours with DMSO or 10  $\mu$ M NAcM-COV. Lysates were subjected to Anti-Flag  
374 immunoprecipitation and the extent of UBE2M N-terminal acetylation was determined by mass  
375 spec. Results are displayed as the percentage of amino-terminal UBE2M peptides that are  
376 acetylated

377 (b) 8-plex TMT proteomics assay was used to examine effects of the chemicals on N-  
378 terminal acetylation. Four conditions were used in this assay, including reversible  
379 inhibitor (NAcM-OPT), covalent inhibitor (NAcM-COV), inactive compounds (NAcM-  
380 NEG), and DMSO control. Each treatment had two biological replicates.

381 (c) Distribution of the Log<sub>2</sub> expression difference in N-terminal acetylated peptides  
382 between NAcM-NEG and DMSO (Comp1). The distribution was fitted with a Gaussian  
383 distribution (dotted line).

384 (d) Distribution of the Log<sub>2</sub> expression difference in N-terminal acetylated peptides  
385 between NAcM-OPT and NAcM-NEG (Comp2). The distribution was fitted with a  
386 Gaussian distribution (dotted line).

387 (e) Distribution of the Log<sub>2</sub> expression difference in N-terminal acetylated peptides  
388 between NAcM-COV and NAcM-NEG (Comp3). The distribution was fitted with a  
389 Gaussian distribution (dotted line).

390 (f) Kolmogorov–Smirnov (KS) test shows that there is no statistical difference between  
391 Comp2 and Comp1 ( $p$  value = 0.939), and between Comp3 and Comp1 ( $p$  value =  
392 0.207), as these  $p$  values are much higher than a common  $p$  value cutoff of 0.05 (95%  
393 confidence interval). The KS test was performed using the R statistical package (version  
394 3.3).

395  
396  
397  
398  
399  
400  
401  
402  
403  
404  
405  
406  
407  
408  
409  
410  
411  
412  
413  
414  
415  
416  
417  
418  
419  
420  
421

## Supplementary Figure 13

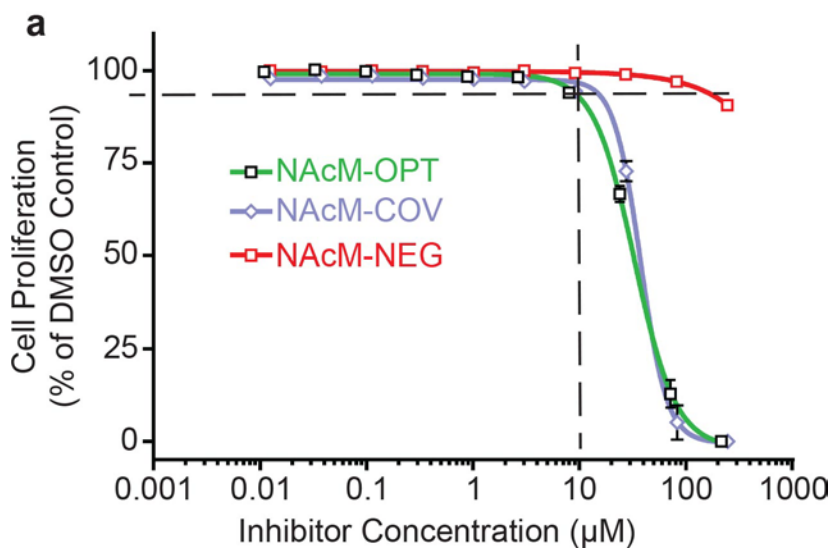

422

423

424

### Supplementary Figure 13. NAcM's do not effect proliferation at 10 µM.

425 (a) Dose-response of inhibitors using CellTiter-Glo cell viability assay for HCC95 cells

426 and demonstrating that NAcM-OPT ( $LD_{50}$   $31.8 \mu\text{M} \pm 0.350$ ), NAcM-COV ( $LD_{50}$   $36.4 \mu\text{M}$

427  $\pm 3.34$ ), and NAcM-NEG ( $LD_{50}$   $>200 \mu\text{M}$ ), are not overtly toxic or growth inhibitory at the

428 concentration of 10 µM used for other cellular assays (highlighted by dashed lines).

429 Potency values are represented as means plus or minus standard deviation calculated

430 from one independent experiment, run in triplicate.

431

432

433

434

435

436

437

438

439

440

441

442

443

## Supplementary Figure 14

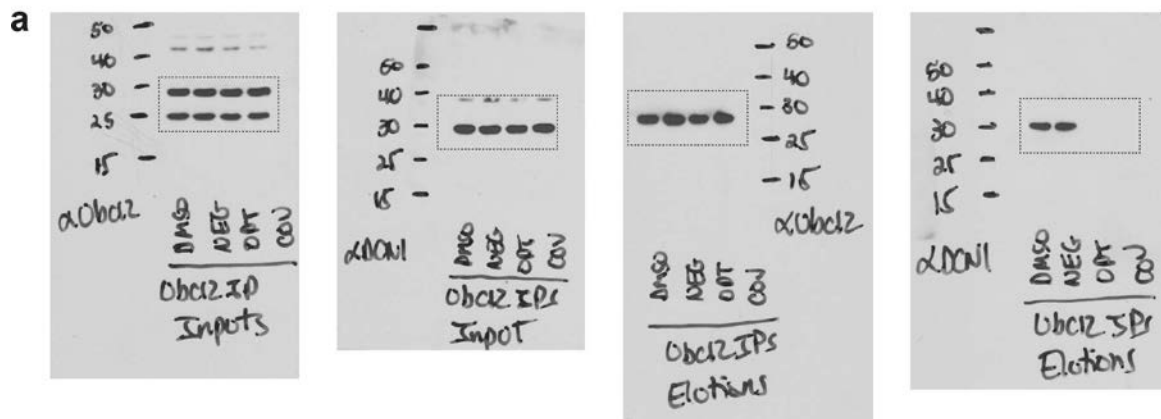

444  
445  
446  
447

Supplementary Figure 14. Full Gel images for a. Figure 4a

## Supplementary Figure 15

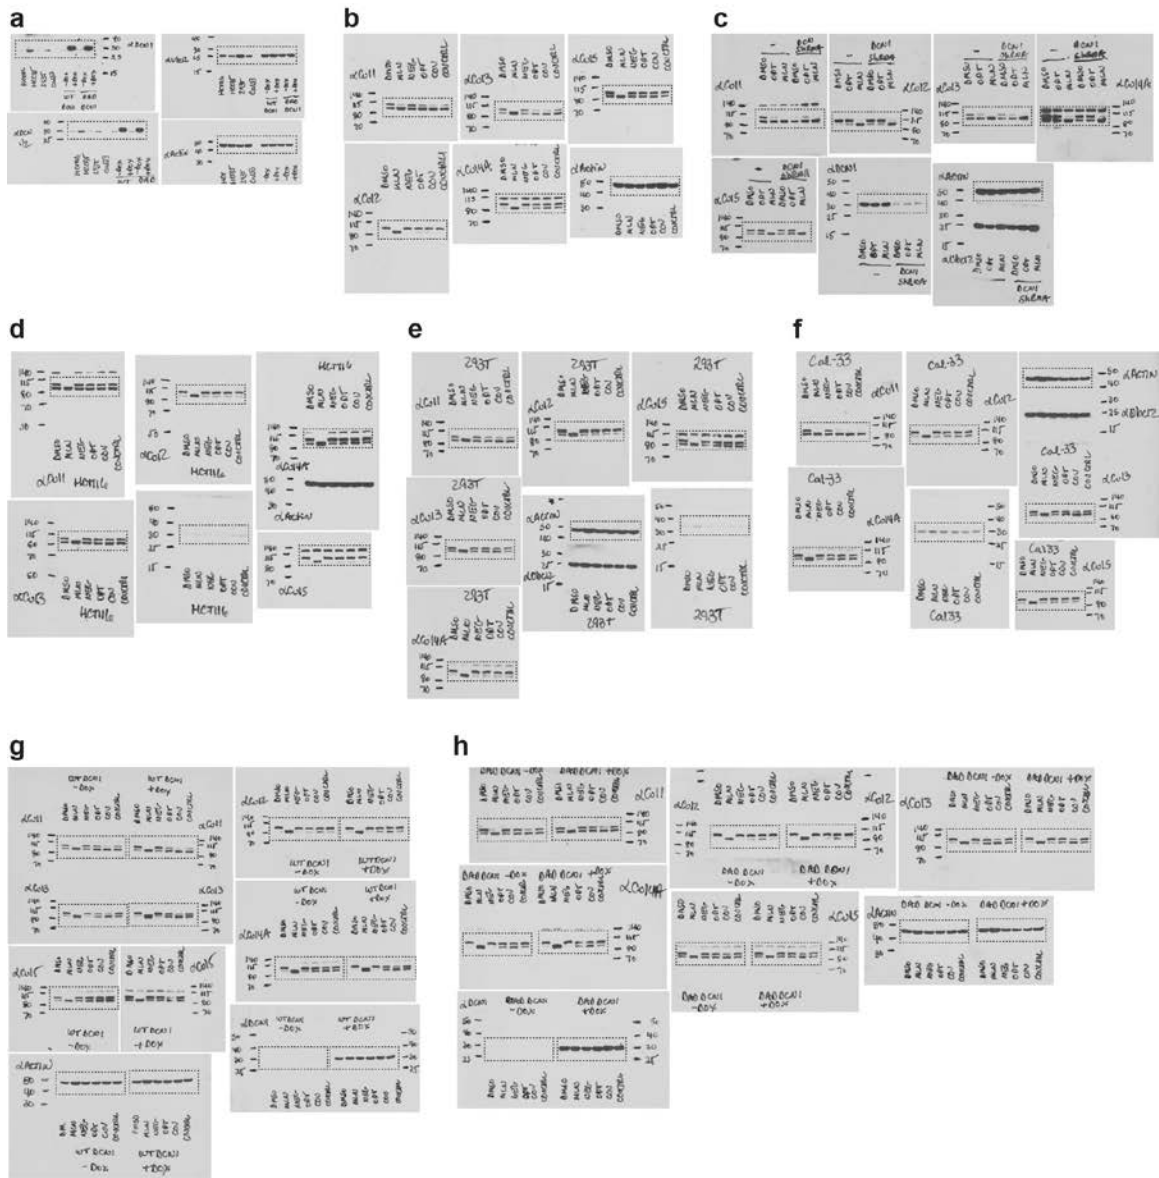

448  
449  
450  
451  
452  
453

**Supplementary Figure 15.** Full Gel images for **a.** Figure 5a **b.** Figure 5b **c.** Figure 5c **d.** Figure 5d HCT116 **e.** Figure 5d 293T **f.** Figure 5d CAL-33 **g.** Figure 5d WT DCN1 293T Flp-In **h.** Figure 5d DAD DCN1 293T Flp-In

# Supplementary Figure 16

a

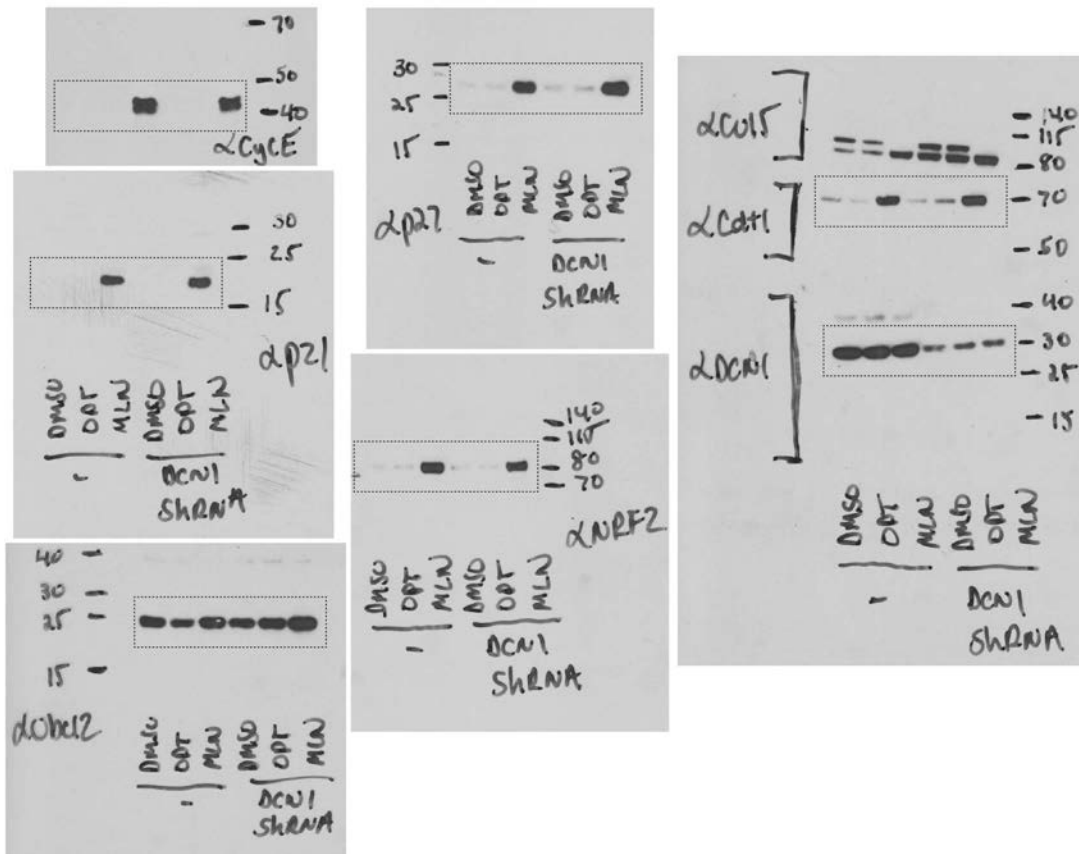

Supplementary Figure 16. Full Gel images for a. Figure 6a.

454  
455  
456  
457  
458  
459  
460  
461  
462  
463  
464  
465  
466  
467  
468  
469  
470  
471  
472  
473  
474  
475  
476

477 **Supplemental Note: Synthetic Information.** Synthetic procedures and structural  
478 characterization of compounds described in the main text and supplemental information.  
479  
480 **Supplemental Dataset 1: Hit Validation Set.** Hits from HTS profiled in dose-response  
481 format.  
482  
483 **Supplemental Dataset 2: Related Analogs.** List of >300 compounds contained within  
484 our screening collection related to NAcM-HIT profiled in single point or dose-response  
485 TR-FRET assay.  
486  
487 **Supplemental Dataset 3: Histone Acetyltransferase Off Target Profiling.** Raw data  
488 for the off target profiling of NAcM inhibitors towards histone acetyltransferases.  
489 Experiments were conducted by Reaction Biology. Source data for generating  
490 Supplementary Fig 9b.  
491  
492 **Supplemental Dataset 4: Bromodomain Off Target Profiling.** Raw data for the off  
493 target profiling of NAcM inhibitors towards bromodomains. Experiments were conducted  
494 by Discover X. Source data for generating Supplementary Fig 9b.  
495  
496 **Supplemental Dataset 5: Histone Deacetylase and Sirtuin Off Target Profiling.** Raw  
497 data for the off target profiling of NAcM inhibitors towards histone deacetylases and  
498 sirtuins. Experiments were conducted by Reaction Biology. Source data for generating  
499 Supplementary Fig 9b.  
500  
501 **Supplemental Dataset 6: UBE2M TMT interaction proteomics.** Raw and normalized  
502 data for UBE2M IP/MS TMT proteomics in the absence or presence of NAcM-OPT.  
503 Source data for generating Fig 4b.  
504  
505 **Supplemental Dataset 7: TMT total Proteome data. 8-plex TMT-LC/LC-MS/MS**  
506 **analysis of N-terminal acetylated peptides.** List of N-terminal acetylated peptide  
507 sequences, protein entries, protein annotation, gene names and the summarized  
508 intensities of the TMT reporter ions in 8 channels. Source data for the generating  
509 Supplementary Fig11b-f.  
510  
511 **Supplemental Dataset 8:** Raw data for TMT total proteomics in the absence or  
512 presence of NAcM inhibitors. Source data for generating Fig 6b.  
513  
514
